# Supplementary material for: Epitopes identified in GAPDH from Clostridium difficile recognized as common antigens with potential autoimmunizing properties
Source: PubMed Central journal article supplement (PMC6141484; doi:10.1038/s41598-018-32193-9), 2018-09-17
Supplement: 41598_2018_32193_MOESM1_ESM.pdf [file 41598_2018_32193_MOESM1_ESM.pdf]

## Supplementary information

Epitopes identified in GAPDH from *Clostridium difficile* recognized as common antigens with potential autoimmunizing properties

Razim A. \*<sup>1</sup>, Pacyga K.<sup>1</sup>, Aptekorz M.<sup>2</sup>, Martirosian G.<sup>2</sup>, Szuba A.<sup>3,4</sup>, Pawlak-Adamska E.<sup>5</sup>, Brzychczy-Włoch M.<sup>6</sup>, Myc A.<sup>1,7</sup>, Gamian A.<sup>1</sup>, Górská S.<sup>1</sup>

<sup>1</sup> Hirszfeld Institute of Immunology and Experimental Therapy, Polish Academy of Sciences, Department of Immunology of Infectious Diseases, Laboratory of Medical Microbiology, Wrocław, Poland

<sup>2</sup> Department of Medical Microbiology, School of Medicine in Katowice, Medical University of Silesia, Katowice, Poland

<sup>3</sup> Division of Angiology, Wrocław Medical University, Wrocław, Poland

<sup>4</sup> Department of Internal Medicine, 4th Military Hospital in Wrocław, Poland

<sup>5</sup> Hirszfeld Institute of Immunology and Experimental Therapy of the Polish Academy of Sciences, Department of Experimental Therapy, Laboratory of Immunopathology, Wrocław, Poland

<sup>6</sup> Department of Molecular Medical Microbiology, Chair of Microbiology, Jagiellonian University Medical College, Krakow, Poland

<sup>7</sup> Research Associate Scientist Emeritus, University of Michigan, Nanotechnology Institute for Medicine and Biological Sciences, Ann Arbor, MI 48109, U.S.A.

Contact: [agnieszka.mehlich@iitd.pan.wroc.pl](mailto:agnieszka.mehlich@iitd.pan.wroc.pl)

Figure S1

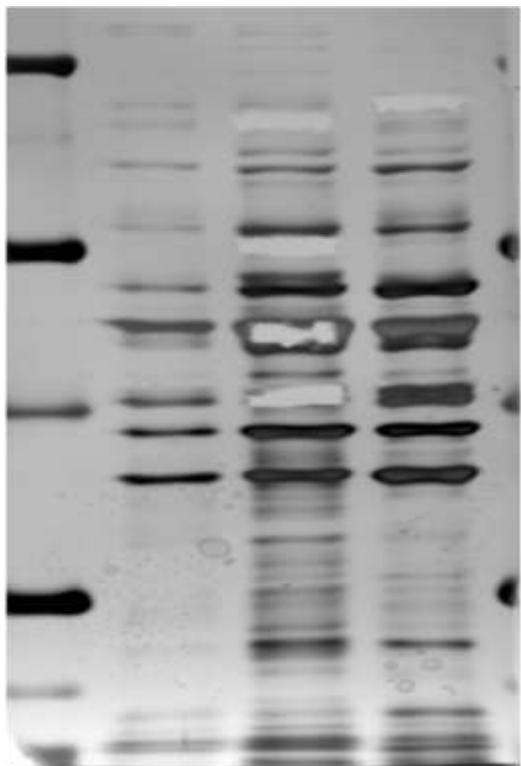

Figure S1 Uncropped gel used in Figure 1

Figure S2

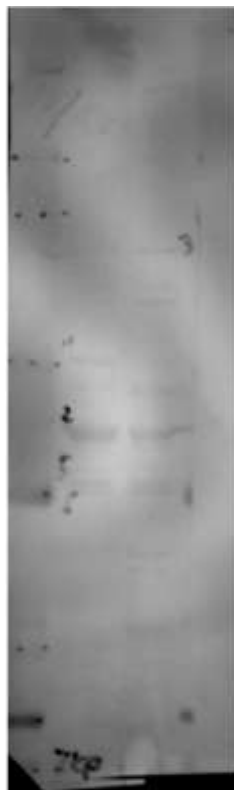

Fig S2 Picture of the original blot used in Figure 1

Table S1 GAPDH as moonlighting protein.

| <b>organism</b>                                                          | <b>alternative function</b>                                                                                                    | <b>reference</b>                        |
|--------------------------------------------------------------------------|--------------------------------------------------------------------------------------------------------------------------------|-----------------------------------------|
| Escherichia coli                                                         | NAD ribosylating activity                                                                                                      | (Aguilera i in. 2009)                   |
| Lactobacillus plantarum                                                  | binds mucin and Caco-2 cells                                                                                                   | (Kinoshita i in. 2008)                  |
| Lactococcus lactis IL1403                                                | binding to invertase, a hyperglycosylated mannoprotein from Saccharomyces cerevisiae                                           | (Katakura i in. 2010)                   |
| Streptococcus anginosus and oralis                                       | plasminogen binding                                                                                                            | (Kinby, Booth, i Svensäter 2008)        |
| Streptococcus pyogenes                                                   | binds uPAR/CD87 receptor on human cells                                                                                        | (Jin i in. 2005)                        |
| Streptococcus suis (serotype 2)                                          | plasminogen binding                                                                                                            | (Jobin i in. 2004)                      |
| Trichomonas vaginalis                                                    | Fibronectin, plasminogen, collagen binding                                                                                     | (Lama i in. 2009)                       |
| Staphylococcus epidermidis and aureus                                    | transferrin-binding protein (also called TPN) and also binds plasminogen involved in the acquisition of transferrin-bound iron | (Modun i Williams 1999)                 |
| Streptococcus pneumoniae                                                 | plasminogen binding                                                                                                            | (Bergmann, Rohde, i Hammerschmidt 2004) |
| Streptococcus agalactiae, group B, serotype III/deltaepsilon, strain J48 | plasminogen binding                                                                                                            | (Seifert i in. 2003)                    |
| Bacillus anthracis                                                       | plasminogen binding                                                                                                            | (Matta, Agarwal, i Bhatnagar 2010)      |
| Mycoplasma genitalium                                                    | binds mucin                                                                                                                    | (Alvarez, Blaylock, i Baseman 2003)     |

- Aguilera, L., Giménez, R., Badia, J., Aguilar, J. & Baldoma, L. NAD<sup>+</sup>-dependent post-translational modification of Escherichia coli glyceraldehyde-3-phosphate dehydrogenase. *Int. Microbiol. Off. J. Span. Soc. Microbiol.* **12**, 187–192 (2009).
- Alvarez, R. A., Blaylock, M. W. & Baseman, J. B. Surface localized glyceraldehyde-3-phosphate dehydrogenase of Mycoplasma genitalium binds mucin. *Mol. Microbiol.* **48**, 1417–1425 (2003).
- Bergmann, S., Rohde, M. & Hammerschmidt, S. Glyceraldehyde-3-Phosphate Dehydrogenase of Streptococcus pneumoniae Is a Surface-Displayed Plasminogen-Binding Protein. *Infect. Immun.* **72**, 2416–2419 (2004).
- Jin, H., Song, Y. P., Boel, G., Kochar, J. & Pancholi, V. Group A Streptococcal Surface GAPDH, SDH, Recognizes uPAR/CD87 as its Receptor on the Human Pharyngeal Cell and Mediates Bacterial Adherence to Host Cells. *J. Mol. Biol.* **350**, 27–41 (2005).
- Jobin, M.-C., Brassard, J., Quessy, S., Gottschalk, M. & Grenier, D. Acquisition of Host Plasmin Activity by the Swine Pathogen Streptococcus suis Serotype 2. *Infect. Immun.* **72**, 606–610 (2004).
- Katakura, Y., Sano, R., Hashimoto, T., Ninomiya, K. & Shioya, S. Lactic acid bacteria display on the cell surface cytosolic proteins that recognize yeast mannan. *Appl. Microbiol. Biotechnol.* **86**, 319–326 (2010).
- Kinnby, B., Booth, N. A. & Svensäter, G. Plasminogen binding by oral streptococci from dental plaque and inflammatory lesions. *Microbiology* **154**, 924–931 (2008).
- Kinoshita, H. *et al.* Cell surface Lactobacillus plantarum LA 318 glyceraldehyde-3-phosphate dehydrogenase (GAPDH) adheres to human colonic mucin. *J. Appl. Microbiol.* **104**, 1667–1674 (2008).
- Lama, A., Kucknoor, A., Mundodi, V. & Alderete, J. F. Glyceraldehyde-3-Phosphate Dehydrogenase Is a Surface-Associated, Fibronectin-Binding Protein of Trichomonas vaginalis. *Infect. Immun.* **77**, 2703–2711 (2009).
- Matta, S. K., Agarwal, S. & Bhatnagar, R. Surface localized and extracellular Glyceraldehyde-3-phosphate dehydrogenase of Bacillus anthracis is a plasminogen binding protein. *Biochim. Biophys. Acta BBA - Proteins Proteomics* **1804**, 2111–2120 (2010).

Modun, B. & Williams, P. The Staphylococcal Transferrin-Binding Protein Is a Cell Wall Glyceraldehyde-3-Phosphate Dehydrogenase. *Infect. Immun.* **67**, 1086–1092 (1999).

Seifert, K. N., McArthur, W. P., Bleiweis, A. S. & Brady, L. J. Characterization of group B streptococcal glyceraldehyde-3-phosphate dehydrogenase: surface localization, enzymatic activity, and protein–protein interactions. *Can. J. Microbiol.* **49**, 350–356 (2003).
